# Supplementary material for: Chain dimension and crystallization temperature affect the II–I transition of isotactic polybutene-1
Source: Royal Society of Chemistry journal article supplement (doi:10.1039/d2ce00765g), 2022-01-01
Supplement: d2ce00765g1.pdf [file d2ce00765g1.pdf]

## Supporting Information for

### Chain dimension and crystallization temperature affected II-I transition of isotactic polybutene-1

Xiaopeng Cui<sup>1,2</sup>, Jiabin Huo<sup>3</sup>, Tongxin Lv<sup>1,3</sup>, Cunliang Hu<sup>3</sup>, Hongfei Li<sup>\*1,4</sup>, Binyuan Liu<sup>\*2</sup>,

Shichun Jiang<sup>\*1,3</sup>

<sup>1</sup>State Key Laboratory of Polymer Physics and Chemistry, Changchun Institute of Applied Chemistry, Chinese Academy of Sciences, Changchun 130022, China

<sup>2</sup>Hebei Key Laboratory of Functional Polymer Materials, School of Chemical Engineering and Science, Hebei University of Technology, Tianjin 300130, China

<sup>3</sup>School of Materials Science and Engineering, Tianjin University, Tianjin, 300072, China

<sup>4</sup>University of Science and Technology of China, Hefei 230026, China

\* Corresponding authors: [hfli@ciac.ac.cn](mailto:hfli@ciac.ac.cn), [byliu@hebut.edu.cn](mailto:byliu@hebut.edu.cn), [scjiang@tju.edu.cn](mailto:scjiang@tju.edu.cn)

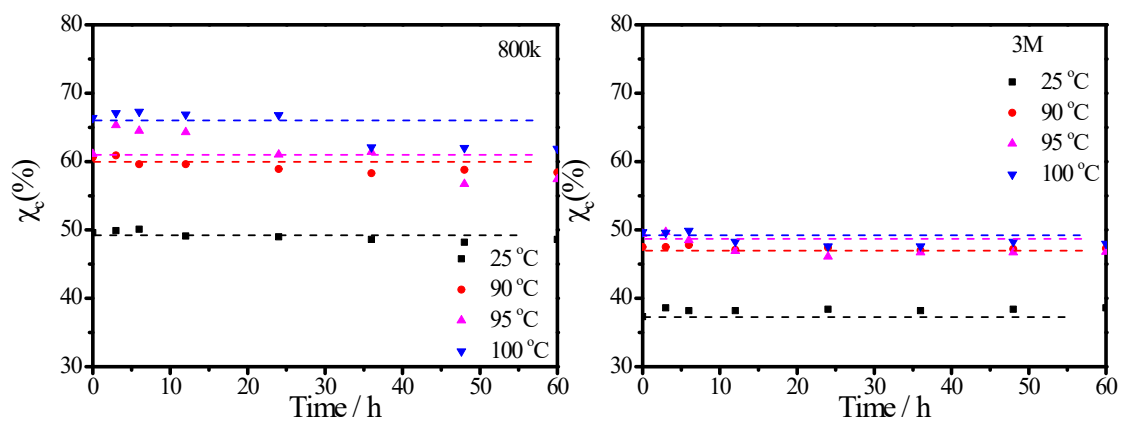

**Figure S1.** Evolution of the total crystallinity of Form II and Form I in 800k and 3M with annealing time

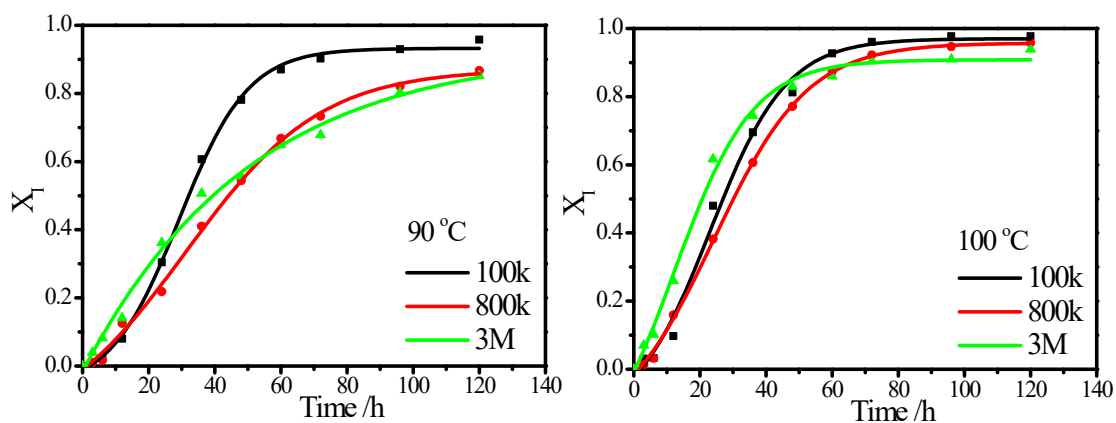

**Figure S2.** Evolution of content of the transformed form I in the iPB-1 samples crystallized at 90 °C and 100 °C as a function of time during annealing at room temperature as indicated in the plots

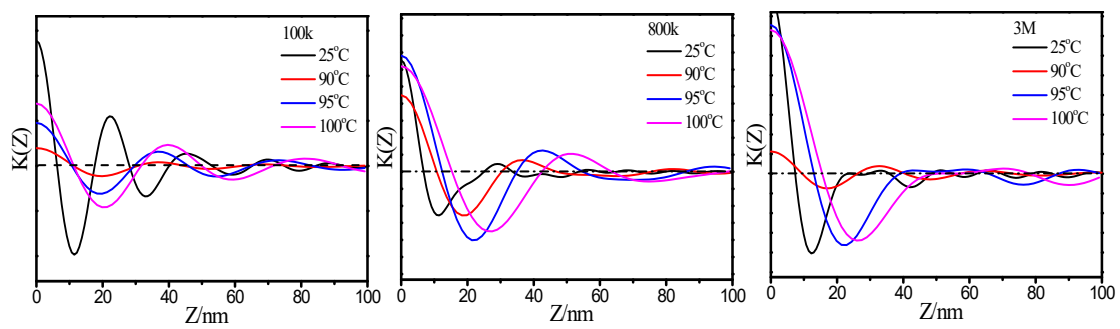

**Figure S3.** Calculated one-dimensional correlation function of the three iPB-1 samples after crystallization and transition
